# Supplementary material
Source: PubMed Central journal article supplement (PMC6261315)
Supplement: NIHMS1505045-supplement-Supplemental_Publication_Material.pdf [file NIHMS1505045-supplement-Supplemental_Publication_Material.pdf]

## SUPPLEMENTARY MATERIAL

**Supplementary Table 1: Correlations between hospital characteristics**

|                                                                                              | $\beta$ | $r^2$  | $p$   |
|----------------------------------------------------------------------------------------------|---------|--------|-------|
| Hospital propensity to pursue BAS vs. propensity for mechanical ventilation                  | 0.05    | 0.01   | 0.56  |
| Hospital propensity for BAS vs. propensity for PGE                                           | -0.01   | 0.0004 | 0.90  |
| Hospital propensity for BAS vs. average age at ASO                                           | 0.03    | 0.20   | 0.004 |
| Hospital propensity for BAS vs. annual CT surgical volume (per 100 cases)                    | -0.02   | 0.05   | 0.18  |
| Hospital propensity for mechanical ventilation vs. propensity for PGE                        | 0.30    | 0.09   | 0.06  |
| Hospital propensity for mechanical ventilation vs. average age at ASO                        | -0.007  | 0.004  | 0.69  |
| Hospital propensity for mechanical ventilation vs. annual CT surgical volume (per 100 cases) | 0.05    | 0.08   | 0.07  |
| Hospital propensity for PGE vs. average age at ASO                                           | -0.02   | 0.02   | 0.33  |
| Hospital propensity for PGE vs. annual CT surgical volume (per 100 cases)                    | 0.02    | 0.01   | 0.46  |
| Hospital average age at ASO vs. annual CT surgical volume (per 100 cases)                    | -0.58   | 0.13   | 0.02  |

*Abbreviations: ASO arterial switch operation, BAS balloon atrial septostomy, CT cardiothoracic, PGE prostaglandin*

**Supplementary Table 2: Multivariable model of preoperative factors associated with post-operative hospital length of stay**

|                                            | <b>Ratio (95% CI)</b> | <b>p</b> |
|--------------------------------------------|-----------------------|----------|
| <b>Age at ASO (per day)</b>                | 1.01 (1.01 to 1.02)   | <0.001   |
| <b>Genetic condition</b>                   | 2.14 (1.74 to 2.63)   | <0.001   |
| <b>Prematurity</b>                         | 1.41 (1.27 to 1.56)   | <0.001   |
| <b>Preoperative prostaglandin infusion</b> | 1.00 (0.94 to 1.07)   | 0.93     |
| <b>Preoperative inotrope infusion</b>      | 1.12 (0.84 to 1.50)   | 0.43     |
| <b>Preoperative mechanical ventilation</b> | 1.16 (1.09 to 1.24)   | <0.001   |
| <b>Balloon atrial septostomy</b>           | 0.78 (0.74 to 0.82)   | <0.001   |

*Abbreviations: ASO arterial switch operation*

**Supplementary Table 3: Multivariable model for risk of death and hospital average age of ASO**

|                                               | <b>Odds ratio (95% CI)</b> | <b>p</b> |
|-----------------------------------------------|----------------------------|----------|
| <b>Hospital average age of ASO</b>            | 1.15 (1.02 to 1.29)        | 0.03     |
| <b>Age at ASO (per day)</b>                   | 1.01 (0.96 to 1.05)        | 0.81     |
| <b>Genetic condition</b>                      | 5.85 (2.20 to 15.55)       | <0.001   |
| <b>Prematurity</b>                            | 2.92 (1.47 to 5.80)        | 0.002    |
| <b>Preoperative PGE infusion</b>              | 0.76 (0.44 to 1.31)        | 0.33     |
| <b>Preoperative inotrope infusion</b>         | 5.04 (1.05 to 24.13)       | 0.04     |
| <b>Preoperative mechanical ventilation</b>    | 1.15 (0.66 to 2.03)        | 0.61     |
| <b>Preoperative balloon atrial septostomy</b> | 0.30 (0.16 to 0.54)        | <0.001   |

*Abbreviations: ASO arterial switch operation, CI confidence interval, PGE prostaglandin*

**Supplementary Table 4: Multivariable model for risk of death and hospital propensity for mechanical ventilation**

|                                                       | <b>Odds ratio (95% CI)</b> | <b>p</b> |
|-------------------------------------------------------|----------------------------|----------|
| <b>Hospital propensity for mechanical ventilation</b> | 1.18 (0.35 to 4.00)        | 0.79     |
| <b>Age at ASO (per day)</b>                           | 1.02 (0.98 to 1.07)        | 0.31     |
| <b>Genetic condition</b>                              | 5.97 (2.29 to 15.58)       | <0.001   |
| <b>Prematurity</b>                                    | 2.84 (1.44 to 5.58)        | 0.002    |
| <b>Preoperative PGE infusion</b>                      | 0.73 (0.43 to 1.26)        | 0.26     |
| <b>Preoperative inotrope infusion</b>                 | 4.79 (1.00 to 22.97)       | 0.05     |
| <b>Preoperative mechanical ventilation</b>            | 1.08 (0.58 to 2.02)        | 0.80     |
| <b>Preoperative balloon atrial septostomy</b>         | 0.32 (0.17 to 0.59)        | <0.001   |

*Abbreviations: ASO arterial switch operation, CI confidence interval, PGE prostaglandin*

**Supplementary Table 5 Multivariable model for risk of death and hospital propensity for BAS**

|                                               | <b>Odds ratio (95% CI)</b> | <b>p</b> |
|-----------------------------------------------|----------------------------|----------|
| <b>Hospital propensity for BAS</b>            | 0.85 (0.11 to 6.81)        | 0.88     |
| <b>Age at ASO (per day)</b>                   | 1.02 (0.98 to 1.07)        | 0.31     |
| <b>Genetic condition</b>                      | 5.99 (2.30 to 15.62)       | <0.001   |
| <b>Prematurity</b>                            | 2.83 (1.44 to 5.57)        | 0.003    |
| <b>Preoperative PGE infusion</b>              | 0.74 (0.43 to 1.26)        | 0.27     |
| <b>Preoperative inotrope infusion</b>         | 4.84 (1.00 to 23.37)       | 0.05     |
| <b>Preoperative mechanical ventilation</b>    | 1.12 (0.64 to 1.97)        | 0.68     |
| <b>Preoperative balloon atrial septostomy</b> | 0.32 (0.17 to 0.60)        | <0.001   |

*Abbreviations: ASO arterial switch operation, BAS balloon atrial septostomy, CI confidence interval, PGE prostaglandin*

**Supplementary Table 6: Multivariable model for risk of death and hospital propensity for PGE**

|                                               | <b>Odds ratio (95% CI)</b> | <b>p</b> |
|-----------------------------------------------|----------------------------|----------|
| <b>Hospital propensity for PGE</b>            | 0.46 (0.14 to 1.53)        | 0.21     |
| <b>Age at ASO (per day)</b>                   | 1.02 (0.98 to 1.07)        | 0.38     |
| <b>Genetic condition</b>                      | 6.36 (2.44 to 16.58)       | <0.001   |
| <b>Prematurity</b>                            | 2.85 (1.45 to 5.60)        | 0.002    |
| <b>Preoperative PGE infusion</b>              | 0.88 (0.48 to 1.59)        | 0.66     |
| <b>Preoperative inotrope infusion</b>         | 4.80 (0.98 to 23.49)       | 0.05     |
| <b>Preoperative mechanical ventilation</b>    | 1.14 (0.65 to 2.00)        | 0.65     |
| <b>Preoperative balloon atrial septostomy</b> | 0.32 (0.17 to 0.59)        | <0.001   |

*Abbreviations: ASO arterial switch operation, CI confidence interval, PGE prostaglandin*

**Supplementary Table 7: Multivariable model for risk of death and hospital CT surgical volume**

|                                                  | <b>Odds ratio (95% CI)</b> | <b>p</b> |
|--------------------------------------------------|----------------------------|----------|
| <b>Annual CT surgical volume (per 100 cases)</b> | 0.83 (0.70 to 0.99)        | 0.04     |
| <b>Age at ASO (per day)</b>                      | 1.02 (0.97 to 1.06)        | 0.49     |
| <b>Genetic condition</b>                         | 5.56 (2.12 to 14.62)       | <0.001   |
| <b>Prematurity</b>                               | 2.78 (1.41 to 5.48)        | 0.003    |
| <b>Preoperative PGE infusion</b>                 | 0.72 (0.42 to 1.24)        | 0.24     |
| <b>Preoperative inotrope infusion</b>            | 4.38 (0.90 to 21.45)       | 0.07     |
| <b>Preoperative mechanical ventilation</b>       | 1.23 (0.70 to 2.19)        | 0.47     |
| <b>Preoperative balloon atrial septostomy</b>    | 0.30 (0.16 to 0.55)        | <0.001   |

*Abbreviations: ASO arterial switch operation, CI confidence interval, CT cardiothoracic, PGE prostaglandin*

**Supplementary Table 8: Multivariable model of preoperative and hospital factors associated with post-operative length of stay**

|                                                       | <b>Ratio (95% CI)</b> | <b>p</b> |
|-------------------------------------------------------|-----------------------|----------|
| <b>Age at ASO (per day)</b>                           | 1.01 (1.00 to 1.02)   | <0.001   |
| <b>Genetic condition</b>                              | 2.07 (1.68 to 2.54)   | <0.001   |
| <b>Prematurity</b>                                    | 1.27 (1.18 to 1.36)   | <0.001   |
| <b>Preoperative prostaglandin infusion</b>            | 1.01 (0.94 to 1.07)   | 0.86     |
| <b>Preoperative inotrope infusion</b>                 | 1.15 (0.86 to 1.54)   | 0.33     |
| <b>Preoperative mechanical ventilation</b>            | 1.17 (1.10 to 1.25)   | <0.001   |
| <b>Balloon atrial septostomy</b>                      | 0.79 (0.75 to 0.84)   | <0.001   |
| <b>Hospital average age at ASO (per day)</b>          | 1.05 (1.01 to 1.09)   | 0.02     |
| <b>Hospital propensity to pursue BAS</b>              | 0.72 (0.39 to 1.34)   | 0.30     |
| <b>Hospital propensity for mechanical ventilation</b> | 1.04 (0.73 to 1.46)   | 0.84     |
| <b>Hospital propensity for prostaglandin</b>          | 0.89 (0.64 to 1.24)   | 0.49     |
| <b>Hospital CT surgical volume (per 100 cases)</b>    | 0.95 (0.90 to 1.00)   | 0.07     |

*Abbreviations: ASO arterial switch operation, BAS balloon atrial septostomy, CI confidence interval, CT cardiothoracic, PGE prostaglandin*



**Supplementary Table 9: Results of multivariable models evaluating the association of prematurity and mortality, length of stay, and cost**

|                        | Mortality              |          | Length of stay      |          | Cost                |          |
|------------------------|------------------------|----------|---------------------|----------|---------------------|----------|
|                        | Odds ratio<br>(95% CI) | <i>p</i> | Ratio<br>(95% CI)   | <i>p</i> | Ratio<br>(95% CI)   | <i>p</i> |
| <b>Gestational age</b> |                        |          |                     |          |                     |          |
| >=37 weeks             | 1                      | n/a      | 1                   | n/a      | 1                   | n/a      |
| 35-36 weeks            | 2.26 (0.96 to 5.35)    | 0.06     | 1.24 (1.12 to 1.38) | <0.001   | 1.20 (1.08 to 1.33) | <0.001   |
| 31-35 weeks            | 2.86 (0.94 to 8.70)    | 0.06     | 1.48 (1.28 to 1.72) | <0.001   | 1.40 (1.21 to 1.62) | <0.001   |
| <=30 weeks             | 21.08 (3.21 to 138.25) | 0.001    | 1.30 (0.82 to 2.05) | 0.27     | 1.22 (0.77 to 1.93) | 0.39     |

*Abbreviations: CI confidence interval*
